# Supplementary material for: Bees for Development: Brazilian Survey Reveals How to Optimize Stingless Beekeeping
Source: PubMed Central journal article supplement (PMC4380461; doi:10.1371/journal.pone.0121157), 2015-03-31
Supplement: pone.0121157.s004.pdf [file pone.0121157.s004.pdf]

# Brazilian stingless beekeeping diagnostic

## Researcher / technician metadata

1. Name \*

---

2. Professional affiliation \*

---

3. Email \*

---

4. Data collection date (date of interview) \*

---

## Beekeeper and property

5. Full name (and nickname) \*

---

6. State \*

---

7. County, city or place where the bees are kept \*

---

8. Contact info (telephone / email)

---

9. Gender:  M  F

10. Age:

---

11. Education level

- no education
- literate
- elementary
- middle
- high
- graduation

12. Main job

---

13. Property type

- rural
- urban

14. Property size

---

15. Do you own the property?

- yes  no

16. Where do you keep the bees?

- backyard
- rural property
- diferente places

17. Is there livestock in the property where the bees are kept (cattle, goats, poultry, fish, etc.)?

- yes  no

18. Are there crops in the property where the bees are kept (corn, beans, manioc, sugarcane, etc.)?

- yes  no

19. Are there flowering plants in the property where the bees are kept (fruit trees or other plants)?

- yes  no

20. Is there native vegetation in the property where the bees are kept (or within 3 Km)?

- yes  no

21. What is the main water source in the property where the bees are kept?

- River or lake  
 pound or tank  
 pipe water

22. Are pesticides used in the property where the bees are kept (insecticides or herbicides)?

- yes  no

23. How long have you been keeping stingless bees?

---

24. Why do you keep stingless bees?

- to earn money selling honey or colonies  
 to consume their honey  
 to help preserve the bees  
 as a hobby  
 other:

25. Someone else keeps bees in the family?

- yes  no

26. How did you learn to keep bees?

- alone  
 with another beekeeper  
 with a technician / extension officer

27. Did you participate in a stingless beekeeping course?

- yes  no

28. Do you know any website about stingless beekeeping?

- yes  no

29. How many stingless beekeepers do you know?

---

30. In addition to keeping stingless bees, do you keep honeybees (*Apis mellifera*)?

- yes  no

31. If you do keep honeybees (*Apis mellifera*), how many honeybee colonies do you have?

---

32. In your opinion, what is the main problem of keeping stingless bees?

- dry season/winter  
 lack of technical skills  
 deforestation  
 lack of money to invest  
 legislation  
 other:

33. In your opinion, today there are more or less stingless bees in the wild than 50 years ago?

- today there are more bees  
 today there are less bees

## Stingless bee management

34. What is the main species you keep? \*

| Common name (scientific name)                       | Mark with an X |
|-----------------------------------------------------|----------------|
| Jataí ( <i>Tetragonisca angustula</i> )             |                |
| Mandaçaia ( <i>Melipona quadrifasciata</i> )        |                |
| Tujuba ( <i>Melipona rufiventris</i> )              |                |
| Uruçu Nordestina ( <i>Melipona scutellaris</i> )    |                |
| Jandaíra ( <i>Melipona subnitida</i> )              |                |
| Mirim, Mosquito, Jatí ( <i>Plebeia</i> sp.)         |                |
| Manduri ( <i>Melipona marginata</i> )               |                |
| Mandaguari, Canudo ( <i>Scaptotrigona</i> sp.)      |                |
| Rajada ( <i>Melipona asilvae</i> )                  |                |
| Guaraipo ( <i>Melipona bicolor</i> )                |                |
| Mandaçaia Nordestina ( <i>Melipona mandacaia</i> )  |                |
| Cupira ( <i>Partamona</i> sp.)                      |                |
| Moça branca, Marmelada ( <i>Frieseomellita</i> sp.) |                |
| Uruçu Amarela ( <i>Melipona flavolineata</i> )      |                |
| Uruçu Cinzenta ( <i>Melipona fasciculata</i> )      |                |
| Uruçu boca de renda ( <i>Melipona seminigra</i> )   |                |
| Other:                                              |                |

35. How many colonies of this species do you have (only from the main species kept)?

\_\_\_\_\_

36. How many colonies do you have overall, including all stingless bee species kept?

\_\_\_\_\_

37. How many stingless be species do you keep?

\_\_\_\_\_

38. What is the main type of box you employ?

- modular INPA / EMBRAPA
- modular Paulo Nogueira Neto
- horizontal long box (Nordestina)
- vertical long box
- tree branch or Calabash fruit
- other:

39. From what kind of wood are most of your boxes made?

\_\_\_\_\_

40. Do you buy empty boxes?

- yes                       no

41. If you do buy empty boxes, how much do you pay for one?

R\$ \_\_\_\_\_

42. Do you check/inspect your bees?

- yes                       no

43. If you do check your bees, how frequently?

- daily
- weekly
- biweekly
- monthly
- trimonthly
- half-yearly
- yearly

44. Do you feed your bees with sugar syrup or honey?

- yes
- no

45. If you do feed your bees, how frequently?

- daily
- biweekly
- trimonthly
- yearly
- weekly
- monthly
- half-yearly

46. If you do feed your bees, where do you provide the food?

- inside the boxes
- outside the boxes

47. Have you lost any colony due to pests or predators?

- yes
- no

48. Do you use vinegar against parasitic flies (phorid flies)?

- yes
- no

49. Do you use grease/oil/poison against ants?

- yes
- no

50. Do you use any protection against lizards, frogs or birds (kills, has a cat, protection on nest entrances)?

- yes
- no

51. Did you lose any colony due to the insecticide sprayed by the dengue-fever car?

- yes
- no

52. How many colonies did you lose last year due to death or swarming?

---

53. How much money do you spend per year keeping stingless bees (buying boxes, new nests, food, etc. )?

R\$ \_\_\_\_\_

## Multiplication

54. Do you multiply stingless bee nests? \*

- yes
- no

55. How do you multiply nests?

- using a single brood disc
- using two or more brood discs from the same nest
- using two or more brood discs from different nests

56. Do you feed newly multiplied (daughter) colonies?

- yes
- no

57. How many new (daughter) colonies did you produce last year?

---

58. Which colonies do you select for multiplying?

- only the strongest/more productive
- any colony, even the weak ones

## Honey sales

59. Do you sell stingless bee honey? \*

- yes
- no

60. How do you harvest honey?

- piercing honey-pots and "fipping the box"
- using a syringe
- using an electric pump connected to a plastic hose

61. Do you use any honey conservation method?

- I do not use any method
- pasteurization
- maturation
- dehumidification / dehydration
- freezing
- I leave honey in the refrigerator

62. On average, how many liters of honey are produced by a single colony in a year? (from the main species kept)

---

63. How many liters of honey did you sell last year?

---

64. How much do you charge for one liter of honey of your main species kept?

R\$ \_\_\_\_\_

65. Who normally buys the honey?

- particular client
- merchant or store

66. How do you sale the honey?

- in labeled containers
- in unlabeled containers

67. Where do you sale the honey?

- at home
- in a road post or store
- in a supermarket

68. Do you participate in a cooperative/local organization selling honey?

- yes                       no

### Colony sales

69. Do you sell stigless bee colonies? \*

- yes                       no

70. How do you normally sale the colonies?

- in boxes
- in tree branches or Calabash fruits

71. How much do you charge for one colony of the main species kept?

R\$ \_\_\_\_\_

72. How many colonies did you sale last year?

\_\_\_\_\_

73. Who normally buys the colonies?

- hobbyists/amateurs
- other stingless beekeepers
- research/development institutes

### Additional observations

74. Do you sell any other stingless bee product?

- I do not sell any other product
- polen
- propolis (geopropolis)
- wax
- other:

75. Additional observations (any relevant comments)

---

---

---

---

### Informed Participation Consent

Herewith I agree to participate in the Project "Brazilian stingless beekeeping diagnostic", and I understand that private information such as the names and addresses of participants will not be disclosed to protect their privacy.

---

(signature of the interviewed beekeeper)

#### Please send to:

Dr. Rodolfo Jaffé  
Laboratório de Abelhas, Instituto de Biociências,  
Universidade de São Paulo (USP).  
Rua do Matão 321, 05508-090 São Paulo-SP.

#### Questions and suggestions:

Dr. Rodolfo Jaffé  
Tel: (11) 9 4962 0915  
Email: r.jaffe@ib.usp.br
