# Supplementary material for: Bees for Development: Brazilian Survey Reveals How to Optimize Stingless Beekeeping
Source: PubMed Central journal article supplement (PMC4380461; doi:10.1371/journal.pone.0121157), 2015-03-31
Supplement: pone.0121157.s005.pdf [file pone.0121157.s005.pdf]

**S1 Table:** Description of all response and predictor variables.

|                               | <b>Variable</b>                     | <b>Description</b>                                                                                                                                                                                      |                              |
|-------------------------------|-------------------------------------|---------------------------------------------------------------------------------------------------------------------------------------------------------------------------------------------------------|------------------------------|
| <b>Response</b>               | Multiplies colonies?                | Whether beekeepers ever multiply their colonies                                                                                                                                                         |                              |
|                               | Sells colonies?                     | Whether beekeepers ever sale their colonies                                                                                                                                                             |                              |
|                               | Sells honey?                        | Whether beekeepers ever sale honey                                                                                                                                                                      |                              |
|                               | Number of colonies                  | Total number of colonies kept                                                                                                                                                                           |                              |
|                               | Number of colonies of main species  | Number of colonies of the main species kept                                                                                                                                                             |                              |
|                               | Number of multiplied colonies       | Number multiplied colonies in a year, among beekeepers that multiplied at least one colony during the previous year.                                                                                    |                              |
|                               | Liters of honey produced per colony | Mean volume of honey produced by a colony of the main kept species per year (in liters).                                                                                                                |                              |
|                               | Number of colonies lost             | Number of colonies lost in a year                                                                                                                                                                       |                              |
|                               | Number of colonies sold             | Number of colonies sold in a year, among beekeepers that sold at least one colony during the previous year.                                                                                             |                              |
|                               | Liters of honey sold                | Volume of honey sold in a year, among beekeepers that sold honey during the previous year.                                                                                                              |                              |
|                               | Earnings in R\$                     | Yearly income from selling honey and/or colonies, calculated as: Earnings = (Liters of honey sold x Price of 1lt of honey) + (Number of colonies sold x Price of one colony)                            |                              |
|                               | Costs in R\$                        | Yearly costs associated to stingless beekeeping                                                                                                                                                         |                              |
|                               | <b>Predictor</b>                    | Age                                                                                                                                                                                                     | Age of the beekeepers        |
|                               |                                     | Years keeping bees                                                                                                                                                                                      | Years keeping stingless bees |
| Number of known beekeepers    |                                     | Number of beekeepers known personally or through social networks                                                                                                                                        |                              |
| Meliponiculture course        |                                     | If beekeepers participated in a meliponiculture course                                                                                                                                                  |                              |
| Meliponiculture website       |                                     | If beekeepers know a website related to meliponiculture                                                                                                                                                 |                              |
| Education level               |                                     | Level of education attained: None/Elementary, Middle, High or Graduate                                                                                                                                  |                              |
| Initiation in meliponiculture |                                     | If beekeepers were first initiated in the practice alone, with the help of a fellow beekeeper, or through an extension officer                                                                          |                              |
| Property area                 |                                     | The area of the property were the bees are kept                                                                                                                                                         |                              |
| Property type                 |                                     | If the property was rural or urban                                                                                                                                                                      |                              |
| Cattle                        |                                     | Presence/absence of cattle in the property                                                                                                                                                              |                              |
| Crops                         |                                     | Presence/absence of crops in the property                                                                                                                                                               |                              |
| Native vegetation             |                                     | Presence/absence of native vegetation within a 3Km ratio.                                                                                                                                               |                              |
| Pesticides                    |                                     | Use/disuse of pesticides in the property                                                                                                                                                                |                              |
| Water source                  |                                     | Pipe water, pound/tank, or river                                                                                                                                                                        |                              |
| Inspection frequency          |                                     | How frequent beekeepers inspect their colonies: Daily, weekly, quarterly, monthly, trimonthly, half-yearly, or yearly                                                                                   |                              |
| Selective breeding            |                                     | Weather beekeepers avoid mixing brood combs from different nests when multiplying colonies, and thus are able to maintain maternal lines                                                                |                              |
| Main box type employed        |                                     | Horizontal long box (north-eastern model), modular box, or other types of boxes                                                                                                                         |                              |
| Honey harvest method          |                                     | Weather beekeepers collect honey by tearing the honey pots and "flipping the box" to let the honey drain into a collection container, or by using syringes or electric pumps connected to plastic hoses |                              |
| Feeding frequency             |                                     | How frequent beekeepers feed their colonies: Daily, weekly, quarterly, monthly, trimonthly, half-yearly, or yearly                                                                                      |                              |
| Supplementary                 |                                     | Whether beekeepers feed their colonies with sugar syrup/honey or not                                                                                                                                    |                              |

|                                     |                                                                                                                                                                                                          |
|-------------------------------------|----------------------------------------------------------------------------------------------------------------------------------------------------------------------------------------------------------|
| feeding                             |                                                                                                                                                                                                          |
| Feeding place                       | If sugar syrup is placed inside or outside colonies                                                                                                                                                      |
| Feeding of multiplied colonies      | If newly multiplied colonies are provided with sugar syrup or not                                                                                                                                        |
| Use of vinegar                      | If vinegar traps are used or not to control parasitic flies                                                                                                                                              |
| Use of oil or grease                | If grease or oil is used or not to protect colonies from ants and other insects                                                                                                                          |
| Other pest control                  | If pests such as lizards, frogs or birds are controlled in any way or not                                                                                                                                |
| Colony price                        | The average price of a living colony                                                                                                                                                                     |
| Honey price                         | The average price of one liter of honey of the main species kept                                                                                                                                         |
| Box price                           | The average price of an empty box                                                                                                                                                                        |
| Property ownership                  | If the beekeeper is the owner of the property where the bees are kept                                                                                                                                    |
| Beekeepers in the family            | If there are other family members that keep bees too                                                                                                                                                     |
| Place where the bees are kept       | If the bees are kept at the home's backyard, in a rural property, or in several places                                                                                                                   |
| Purchase of boxes                   | If beekeepers buy empty boxes or not                                                                                                                                                                     |
| Use of labels in honey containers   | If beekeepers label the honey containers they intend to sell                                                                                                                                             |
| Participates in a honey cooperative | If beekeepers participate in a honey cooperative or not                                                                                                                                                  |
| Customers buying colonies           | If the customers buying colonies are hobbyists or established beekeepers                                                                                                                                 |
| Honey conservation method           | Which method is employed to preserve honey: None, placing honey in a refrigerator, or using one of the established honey conservation methods (freezing, pasteurization, maturation or dehumidification) |
| Number of species                   | Number of species kept                                                                                                                                                                                   |
| Number of honeybee colonies         | Number of honeybee colonies ( <i>Apis mellifera</i> ) kept, among stingless beekeepers that also keep honeybees                                                                                          |
| Keeping of honeybees                | If beekeepers keep <i>Apis mellifera</i> as well as stingless bees                                                                                                                                       |
