# Supplementary material for: Bees for Development: Brazilian Survey Reveals How to Optimize Stingless Beekeeping
Source: PubMed Central journal article supplement (PMC4380461; doi:10.1371/journal.pone.0121157), 2015-03-31
Supplement: pone.0121157.s006.pdf [file pone.0121157.s006.pdf]

**S2 Table:** Gender, State, and Job distribution of interviewed beekeepers.

| <b>Item</b>            | <b>Category</b> | <b>N</b> |
|------------------------|-----------------|----------|
| <b>Gender</b>          | M               | 237      |
|                        | F               | 14       |
| <b>State</b>           | SP              | 36       |
|                        | PR              | 26       |
|                        | SC              | 26       |
|                        | BA              | 23       |
|                        | RN              | 22       |
|                        | MG              | 19       |
|                        | PA              | 18       |
|                        | RS              | 17       |
|                        | PE              | 16       |
|                        | CE              | 11       |
|                        | RJ              | 10       |
|                        | PB              | 8        |
|                        | DF              | 4        |
|                        | ES              | 4        |
|                        | AL              | 2        |
|                        | AM              | 2        |
|                        | GO              | 2        |
|                        | MA              | 2        |
| MS                     | 2               |          |
| RO                     | 1               |          |
| <b>Job<sup>a</sup></b> | Agronomy        | 64       |
|                        | Other           | 48       |
|                        | Public Server   | 29       |
|                        | Retired         | 21       |
|                        | Commerce        | 17       |
|                        | Tradesman       | 14       |
|                        | Education       | 10       |
|                        | Health          | 9        |
|                        | Student         | 8        |
|                        | Technician      | 7        |
| Administration         | 6               |          |

<sup>a</sup> Not all beekeepers disclosed their main economic activity.
