# Supplementary material for: Bees for Development: Brazilian Survey Reveals How to Optimize Stingless Beekeeping
Source: PubMed Central journal article supplement (PMC4380461; doi:10.1371/journal.pone.0121157), 2015-03-31
Supplement: pone.0121157.s007.pdf [file pone.0121157.s007.pdf]

**S3 Table:** Summary statistics for all variables.  $N_{tot}$  represents the total number of beekeepers providing an answer for each question (not all beekeepers responded to all questions), while  $N_{reply}$  represents the number of beekeepers in each reply category (only for categorical variables).

|                  | Variable                           | $N_{tot}$ | $N_{reply}$                                                                                               | Median/Mean | Min-Max    |
|------------------|------------------------------------|-----------|-----------------------------------------------------------------------------------------------------------|-------------|------------|
| <b>Response</b>  | Multiplies colonies?               | 251       | No: 48<br>Yes: 203                                                                                        | -           | -          |
|                  | Sells colonies?                    | 251       | No: 177<br>Yes: 74                                                                                        | -           | -          |
|                  | Sells honey?                       | 251       | No: 156<br>Yes: 95                                                                                        | -           | -          |
|                  | Number of colonies                 | 251       | -                                                                                                         | 22.00/72.65 | 1-3500     |
|                  | Number of colonies of main species | 241       | -                                                                                                         | 13.00/36.66 | 1-800      |
|                  | Number of multiplied colonies      | 165       | -                                                                                                         | 8.00/19.85  | 1-200      |
|                  | Honey production per colony        | 89        | -                                                                                                         | 1.50/2.07   | 0.04-10.00 |
|                  | Colony loses                       | 234       | -                                                                                                         | 2.00/7.265  | 0-700      |
|                  | Colony sales                       | 63        | -                                                                                                         | 12.00/24.33 | 1-200      |
|                  | Honey sales                        | 76        | -                                                                                                         | 14.50/40.03 | 1-500      |
|                  | Income                             | 102       | -                                                                                                         | 1500/4535   | 70-55000   |
|                  | Costs                              | 168       | -                                                                                                         | 500/1511    | 15-23600   |
| <b>Predictor</b> | Age                                | 247       | -                                                                                                         | 46.00/44.60 | 15-80      |
|                  | Years keeping bees                 | 236       | -                                                                                                         | 6/10.86     | 0.083-54   |
|                  | Number of known beekeepers         | 217       | -                                                                                                         | 8/22.87     | 1-200      |
|                  | Meliponiculture course             | 224       | No: 102<br>Yes: 122                                                                                       | -           | -          |
|                  | Meliponiculture website            | 248       | No: 63<br>Yes: 185                                                                                        | -           | -          |
|                  | Education level                    | 249       | None/Elementary: 58<br>Middle: 74<br>High: 73<br>Graduate: 44                                             | -           | -          |
|                  | Initiation in meliponiculture      | 246       | Beekeeper: 96<br>Alone: 109<br>Technitian: 41                                                             | -           | -          |
|                  | Property area                      | 169       | -                                                                                                         | 2.00/19.90  | 0.004-300  |
|                  | Property type                      | 234       | Rural: 124<br>Urban: 110                                                                                  | -           | -          |
|                  | Cattle                             | 249       | No: 153<br>Yes: 96                                                                                        | -           | -          |
|                  | Crops                              | 249       | No: 135<br>Yes: 114                                                                                       | -           | -          |
|                  | Native vegetation                  | 241       | No: 32<br>Yes: 209                                                                                        | -           | -          |
|                  | Pesticides                         | 245       | No: 208<br>Yes: 37                                                                                        | -           | -          |
|                  | Water source                       | 243       | Pipe water: 81<br>Pound/tank: 48<br>River: 114                                                            | -           | -          |
|                  | Inspection frequency               | 239       | Dayly: 31<br>Weekly: 79<br>Quarterly: 51<br>Monthly: 45<br>Trimonthly: 9<br>Half-yearly: 11<br>Yearly: 13 | -           | -          |

|                                     |     |                                                                                                         |           |        |
|-------------------------------------|-----|---------------------------------------------------------------------------------------------------------|-----------|--------|
| Selective breeding                  | 196 | No: 50<br>Yes: 146                                                                                      | -         | -      |
| Main box type employed              | 232 | Horizontal long box: 49<br>Modular box: 128<br>Others: 55                                               | -         | -      |
| Honey harvest method                | 94  | Flipping the box: 42<br>Syringe/Pump: 52                                                                | -         | -      |
| Feeding frequency                   | 174 | Dayly: 10<br>Weekly: 88<br>Quarterly: 29<br>Monthly: 27<br>Trimonthly: 7<br>Half-yearly: 4<br>Yearly: 9 | -         | -      |
| Supplementary feeding               | 244 | No: 72<br>Yes: 172                                                                                      | -         | -      |
| Feeding place                       | 163 | Inside: 140<br>Outside: 23                                                                              | -         | -      |
| Feeding of multiplied colonies      | 199 | No: 21<br>Yes: 178                                                                                      | -         | -      |
| Use of vinegar                      | 248 | No: 116<br>Yes: 132                                                                                     | -         | -      |
| Use of oil or grease                | 249 | No: 158<br>Yes: 91                                                                                      | -         | -      |
| Other pest control                  | 244 | No: 152<br>Yes: 92                                                                                      | -         | -      |
| Colony price                        | 73  | -                                                                                                       | 175/193.4 | 20-500 |
| Honey price                         | 90  | -                                                                                                       | 50/67.22  | 15-200 |
| Box price                           | 122 | -                                                                                                       | 40/43.02  | 10-110 |
| Property ownership                  | 231 | No: 53<br>Yes: 178                                                                                      | -         | -      |
| Beekeepers in the family            | 249 | No: 165<br>Yes: 84                                                                                      | -         | -      |
| Place were the bees are kept        | 247 | At home: 120<br>Rural property: 61<br>Several places: 66                                                | -         | -      |
| Purchase of boxes                   | 245 | No: 116<br>Yes: 129                                                                                     | -         | -      |
| Use of labels in honey containers   | 95  | No: 63<br>Yes: 32                                                                                       | -         | -      |
| Participates in a honey cooperative | 95  | No: 71<br>Yes: 24                                                                                       | -         | -      |
| Customers buying colonies           | 69  | Hobbyists: 34<br>Beekeepers: 35                                                                         | -         | -      |
| Honey conservation method           | 93  | None: 34<br>Refrigerator: 31<br>Established: 28                                                         | -         | -      |
| Number of species                   | 243 | -                                                                                                       | 4/5       | 1-28   |
| Number of honeybee colonies         | 79  | -                                                                                                       | 20/54.29  | 2-600  |
| Keeping of honeybees                | 233 | No: 149<br>Yes: 84                                                                                      | -         | -      |
