# Supplementary material for: Bees for Development: Brazilian Survey Reveals How to Optimize Stingless Beekeeping
Source: PubMed Central journal article supplement (PMC4380461; doi:10.1371/journal.pone.0121157), 2015-03-31
Supplement: pone.0121157.s008.pdf [file pone.0121157.s008.pdf]

**S4 Table:** List of the main species kept by 246 Brazilian stingless beekeepers, their common names in Brazil, and the number and proportion of beekeepers rearing each one. Although beekeepers also reared other species, they were not included in this list since they were not registered as the main species kept.

| Species <sup>a</sup>                                     | Popular name(s) in Brazil <sup>a</sup>            | N. beekeepers (%) |
|----------------------------------------------------------|---------------------------------------------------|-------------------|
| <i>Tetragonisca angustula</i> Latreille, 1811            | jataí                                             | 69 (28,0%)        |
| <i>Melipona quadrifasciata</i> Lepeletier, 1836          | mandaçaia                                         | 43 (17,5%)        |
| <i>Melipona subnitida</i> Ducke, 1909                    | jandaíra                                          | 33 (13,4%)        |
| <i>Melipona scutellaris</i> Latreille, 1811              | uruçu do nordeste                                 | 28 (11,4%)        |
| <i>Melipona fasciculata</i> Smith, 1854                  | uruçu-cinzenta; tiúba                             | 14 (5,7%)         |
| <i>Melipona mandacaia</i> Smith 1863                     | mandaçaia                                         | 11 (4,5%)         |
| <i>Melipona flavolineata</i> Friese, 1900                | uruçu-amarela; ira-açu                            | 11 (4,5%)         |
| <i>Melipona</i> aff. <i>rufiventris</i> Lepeletier, 1836 | tujuba; tuiúva; tujuva                            | 10 (4,1%)         |
| <i>Plebeia</i> spp. Schwarz, 1938                        | mirim, mosquito, jati, mosquitinho                | 8 (3,3%)          |
| <i>Scaptotrigona</i> spp. Moure, 1942                    | canudo, mandaguari, tubiba, tubi, tubuna          | 6 (2,4%)          |
| <i>Melipona bicolor</i> Lepeletier, 1836                 | guaraipo                                          | 3 (1,2%)          |
| <i>Melipona seminigra</i> Friese, 1903                   | uruçu-boca-de-renda                               | 2 (0,8%)          |
| <i>Frieseomelitta</i> spp. Ihering, 1912                 | moça branca, moça preta, amarela, marmelada, breu | 2 (0,8%)          |
| <i>Nannotrigona testaceicornis</i> (Lepeletier, 1836)    | iraí                                              | 1 (0,4%)          |
| <i>Melipona marginata</i> Lepeletier, 1836               | manduri                                           | 1 (0,4%)          |
| <i>Melipona interrupta</i> Latreille, 1811               | jandaíra-preta-da-Amazônia; jupará                | 1 (0,4%)          |
| <i>Melipona capixaba</i> Moure & Camargo, 1994           | uruçu-preto                                       | 1 (0,4%)          |
| <i>Melipona favosa</i> Fabricius, 1798                   | rabipintada; erica                                | 1 (0,4%)          |
| <i>Friesella</i> spp. Moure, 1946                        | mirim preguiça                                    | 1 (0,4%)          |

<sup>a</sup> References:

Camargo MF, Pedro SRM (2012) Meliponini Lepeletier, 1836. Catalogue of Bees (Hymenoptera, Apoidea) in the Neotropical Region. Online version available at <http://www.moure.cria.org.br/catalogue>  
 Nogueira-Neto P (1997) Vida e Criação de Abelhas Indígenas Sem Ferrão. Editora Nogueirapis, São Paulo. Online version available at [http://www.webbee.org.br/webbee123/publicacoes/livro\\_pnn.pdf](http://www.webbee.org.br/webbee123/publicacoes/livro_pnn.pdf)
