# Supplementary material for: Bees for Development: Brazilian Survey Reveals How to Optimize Stingless Beekeeping
Source: PubMed Central journal article supplement (PMC4380461; doi:10.1371/journal.pone.0121157), 2015-03-31
Supplement: pone.0121157.s009.pdf [file pone.0121157.s009.pdf]

**S5 Table:** Regression estimates, standard errors (SE), confidence intervals (CI), z or t-values and p-values for all best models. Estimates are provided for each level of the categorical predictors. Note that all predictors included in these best models significantly increased the model's likelihood at  $p < 0.05$  (likelihood ratio tests).

| Response                                   | Predictor                           | Estimate<br>(SE) | CI           | z/t   | $p^a$                               | $r^{2b}$ |
|--------------------------------------------|-------------------------------------|------------------|--------------|-------|-------------------------------------|----------|
| <b>Multiplies colonies?</b>                | Number of colonies (log)            | 0.44 (0.19)      | 0.09, 0.82   | 2.39  | 0.017 / 0.02                        | 0.43     |
|                                            | Meliponiculture course (Yes)        | 1.25 (0.49)      | 0.31, 2.27   | 2.54  | 0.011 / 0.02                        |          |
|                                            | Native vegetation (Yes)             | 1.57 (0.54)      | 0.52, 2.66   | 2.89  | 0.004 / 0.008                       |          |
|                                            | Supplementary feeding (Yes)         | 1.64 (0.44)      | 0.79, 2.54   | 3.71  | <0.001 / <0.001                     |          |
| <b>Sells colonies?</b>                     | Honey sales (Yes)                   | 1.73 (0.42)      | 0.96, 2.60   | 4.16  | <0.001                              | 0.35     |
|                                            | Number of known beekeepers (log)    | 0.32 (0.16)      | 0.01, 0.62   | 2.03  | 0.04 / 0.04                         |          |
|                                            | Supplementary feeding (Yes)         | 1.12 (0.45)      | 0.27, 2.06   | 2.47  | 0.01 / 0.03                         |          |
| <b>Sells honey?</b>                        | Colony sales (Yes)                  | 1.65 (0.47)      | 0.75, 2.63   | 3.48  | <0.001                              | 0.57     |
|                                            | Years keeping bees (log)            | 0.47 (0.21)      | 0.07, 0.90   | 2.23  | 0.03 / 0.05                         |          |
|                                            | Meliponiculture course (Yes)        | 0.97 (0.44)      | 0.12, 1.85   | 2.21  | 0.03 / 0.03                         |          |
|                                            | Education (Middle)                  | -0.08 (0.62)     | -1.28, 1.16  | -0.14 | 0.89 / 1.0                          |          |
|                                            | Education (High)                    | -2.08 (0.68)     | -3.49, 0.78  | -3.05 | 0.002 / 0.01                        |          |
|                                            | Education (Graduate)                | -1.51 (0.69)     | -2.90, -0.16 | -2.17 | 0.03 / 0.14                         |          |
|                                            | Crops (Yes)                         | 1.16 (0.44)      | 0.31, 2.06   | 2.62  | 0.01                                |          |
| Property type (Urban)                      | -0.98 (0.45)                        | -1.90, -0.11     | -2.18        | 0.03  |                                     |          |
| <b>Number of colonies</b>                  | Years keeping bees (log)            | 0.62 (0.06)      | 0.51, 0.74   | 10.53 | <0.001 / <0.001 <sub>(141.13)</sub> | 0.62     |
|                                            | Number of known beekeepers (log)    | 0.33 (0.06)      | 0.22, 0.44   | 5.78  | <0.001 / <0.001 <sub>(173.11)</sub> |          |
|                                            | Native vegetation (Yes)             | 0.51 (0.18)      | 0.15, 0.87   | 2.76  | 0.006 / 0.008 <sub>(180.94)</sub>   |          |
|                                            | Use of vinegar (Yes)                | 0.46 (0.13)      | 0.2, 0.72    | 3.46  | <0.001 <sub>(180.91)</sub>          |          |
|                                            | Supplementary feeding (Yes)         | 0.62 (0.16)      | 0.31, 0.92   | 3.91  | <0.001 / <0.001 <sub>(178.48)</sub> |          |
| <b>Number of colonies of main species</b>  | Years keeping bees (log)            | 0.54 (0.06)      | 0.41, 0.67   | 8.38  | <0.001 / <0.001 <sub>(190.45)</sub> | 0.45     |
|                                            | Number of known beekeepers (log)    | 0.31 (0.06)      | 0.2, 0.43    | 5.30  | <0.001 / <0.001 <sub>(190.97)</sub> |          |
| <b>Number of multiplied colonies</b>       | Number of colonies (log)            | 0.85 (0.04)      | 0.77, 0.94   | 19.44 | <0.001 / <0.001 <sub>(117.72)</sub> | 0.84     |
|                                            | Number of known beekeepers (log)    | 0.12 (0.04)      | 0.04, 0.2    | 2.85  | 0.01 / 0.01 <sub>(116.50)</sub>     |          |
|                                            | Supplementary feeding (Yes)         | 0.34 (0.13)      | 0.08, 0.6    | 2.53  | 0.01 / 0.03 <sub>(120.92)</sub>     |          |
|                                            | Property ownership (Yes)            | -0.34 (0.13)     | -0.58, -0.09 | -2.67 | 0.01 <sub>(118.50)</sub>            |          |
| <b>Liters of honey produced per colony</b> | Selective breeding (Yes)            | 0.38 (0.18)      | 0.02, 0.74   | 2.11  | 0.04 <sub>(67.13)</sub>             | 0.24     |
| <b>Number of colonies lost</b>             | Inspection frequency                | 0.24 (0.09)      | 0.07, 0.42   | 2.69  | 0.01                                | 0.1      |
|                                            | Honey harvest method (Syringe/Pump) | -0.61 (0.31)     | -1.24, 0.002 | -1.95 | 0.05                                |          |
| <b>Number of colonies sold</b>             | Years keeping bees (log)            | 0.82 (0.12)      | 0.59, 1.06   | 6.99  | <0.001 / <0.001 <sub>(55.56)</sub>  | 0.51     |

|                             |                                                              |              |              |       |                                |      |
|-----------------------------|--------------------------------------------------------------|--------------|--------------|-------|--------------------------------|------|
| <b>Liters of honey sold</b> | Number of colonies of main species (log)                     | 0.45 (0.11)  | 0.23, 0.68   | 3.92  | <0.001 <sub>(53.55)</sub>      | 0.74 |
|                             | Years keeping bees (log)                                     | 0.61 (0.27)  | 0.08, 1.2    | 2.25  | 0.06 / 0.06 <sub>(7.53)</sub>  |      |
|                             | Honey conservation method (Refrigerator)                     | -0.32 (0.26) | -0.86, 0.19  | -1.22 | 0.23 / 0.46 <sub>(43.60)</sub> |      |
|                             | Honey conservation method (Established)                      | 0.5 (0.26)   | -0.04, 1     | 1.92  | 0.06 / 0.18 <sub>(52.84)</sub> |      |
| <b>Earnings is R\$</b>      | Number of colonies (log)                                     | 0.41 (0.14)  | 0.14, 0.68   | 2.99  | 0.003 / 0.008                  | 0.63 |
|                             | Labeling of honey containers (Yes)                           | -1.00 (0.91) | -2.82, 0.82  | -1.10 | 0.28                           |      |
|                             | Honey conservation method (Refrigerator)                     | -0.75 (0.3)  | -1.34, -0.16 | -2.54 | 0.01 / 0.05                    |      |
|                             | Honey conservation method (Established)                      | 0.31 (0.31)  | -0.31, 0.93  | 1.01  | 0.32 / 0.46                    |      |
|                             | Number of colonies (log): Labeling of honey containers (Yes) | 0.47 (0.21)  | 0.06, 0.88   | 2.30  | 0.02                           |      |
| <b>Costs in R\$</b>         | Number of colonies (log)                                     | 0.47 (0.06)  | 0.35, 0.6    | 7.33  | <0.001 / <0.001                | 0.46 |
|                             | Education (Middle)                                           | -0.02 (0.31) | -0.62, 0.59  | -0.05 | 0.96 / 1.0                     |      |
|                             | Education (High)                                             | 0.51 (0.3)   | -0.08, 1.11  | 1.70  | 0.09 / 0.27                    |      |
|                             | Education (Graduate)                                         | 0.75 (0.34)  | 0.08, 1.41   | 2.23  | 0.03 / 0.14                    |      |
|                             | Feeding frequency (centered)                                 | -0.17 (0.06) | -0.3, -0.04  | -2.67 | 0.01                           |      |
|                             | Age (centered)                                               | 0.02 (0.01)  | 0.01, 0.03   | 2.84  | 0.01                           |      |
|                             | Feeding frequency (centered) : Age (centered)                | 0.01 (0.01)  | 0.003, 0.02  | 2.62  | 0.01                           |      |

<sup>a</sup> For predictors appearing more than once in the best models, we computed *p-values* adjusted for multiple tests (Holm-corrected *p-values* are given after /). Degrees of freedom are given in brackets for cases where *p-values* were computed using the Satterthwaite approximation (lmerTest package). <sup>b</sup> While conditional  $r^2$  values are presented for Generalized Mixed-Effect Models (LMM and GLMM), adjusted  $r^2$  are shown for linear models (LM).
